# Supplementary material for: Identification of the Potential Molecular Mechanism of TGFBI Gene in Persistent Atrial Fibrillation
Source: Hindawi journal article supplement (doi:10.1155/2022/1643674), 2022-11-08
Supplement: f1 [file 1643674.f1.zip]

**Table S2. GO annotation and KEGG pathway TGFBI and co-expression genes enriched in Cluster 1**

| Category | Term                                                                                                         | Count | %     | PValue   | Genes                                                                                                                                                 |
|----------|--------------------------------------------------------------------------------------------------------------|-------|-------|----------|-------------------------------------------------------------------------------------------------------------------------------------------------------|
| BP       | GO:0030198~extracellular matrix organization                                                                 | 25    | 0.126 | 3.12E-21 | COL4A2/COL4A1/LUM/COL3A1/ITGA1/ITGB2/SPARC/DCN/COL5A2/VCAM1/FBLN1/LAMA4/COL14A1/CD44/COL7A1/FBLN5/COL6A3/TGFBI/COL1A2/COL6A1/VCAN/LOX/LAMB1/LOXL1/FN1 |
| BP       | GO:0060333~interferon-gamma-mediated signaling pathway                                                       | 13    | 0.065 | 7.59E-13 | HLA-DQB1/VCAM1/CD44/HLA-A/IRF1/HLA-C/HLA-DPA1/HLA-B/HLA-DPB1/HLA-E/TRIM22/HLA-G/HLA-F                                                                 |
| BP       | GO:0030574~collagen catabolic process                                                                        | 12    | 0.060 | 5.85E-12 | COL4A2/COL4A1/COL7A1/COL6A5/COL3A1/COL6A3/COL1A2/COL15A1/COL6A1/MMP13/MMP2/COL5A2                                                                     |
| BP       | GO:0060337~type I interferon signaling pathway                                                               | 12    | 0.060 | 5.85E-12 | EGR1/IFI27/BST2/IFITM2/IFITM3/HLA-A/IRF1/HLA-C/HLA-B/HLA-E/HLA-G/HLA-F                                                                                |
| BP       | GO:0030199~collagen fibril organization                                                                      | 10    | 0.050 | 3.12E-11 | FMOD/COL14A1/SERPINF2/LUM/COL3A1/COL1A2/LOX/SERPINH1/COL5A2/ANXA2                                                                                     |
| BP       | GO:0045087~innate immune response                                                                            | 21    | 0.106 | 6.83E-10 | FRK/NCF2/BST2/S100A7/LY86/CLU/ANXA1/HLA-C/SERPING1/HLA-B/TRIM10/HLA-E/C1QA/C1QB/CYBB/APOL1/PYCARD/FCER1G/CD14/TYROBP/CSF1R                            |
| BP       | GO:0006955~immune response                                                                                   | 20    | 0.101 | 3.11E-09 | HLA-DQB1/PTGER4/C3/IFITM2/IFITM3/HLA-A/HLA-C/HLA-B/HLA-DMB/CCL16/HLA-E/HLA-DMA/TRIM22/CXCL12/HLA-F/FCGR2B/CD4/HLA-DPA1/HLA-DPB1/LCP2                  |
| BP       | GO:0050776~regulation of immune response                                                                     | 14    | 0.070 | 3.97E-09 | C3/COL3A1/HLA-A/ITGB2/HLA-C/HLA-B/HLA-E/HLA-G/HLA-F/VCAM1/FCGR2B/IRF1/COL1A2/TYROBP                                                                   |
| BP       | GO:0002480~antigen processing and presentation of exogenous peptide antigen via MHC class I, TAP-independent | 6     | 0.030 | 5.12E-09 | HLA-A/HLA-C/HLA-B/HLA-E/HLA-G/HLA-F                                                                                                                   |
| BP       | GO:0019882~antigen processing and presentation                                                               | 9     | 0.045 | 1.97E-08 | HLA-DQB1/HLA-A/HLA-C/HLA-DPA1/HLA-B/HLA-DPB1/HLA-DMB/HLA-E/HLA-G                                                                                      |

|    |                                                                                                            |    |       |          |                                                                                                                  |
|----|------------------------------------------------------------------------------------------------------------|----|-------|----------|------------------------------------------------------------------------------------------------------------------|
| BP | GO:0002479~antigen processing and presentation of exogenous peptide antigen via MHC class I, TAP-dependent | 9  | 0.045 | 5.93E-08 | CYBB/NCF2/HLA-A/HLA-C/HLA-B/HLA-E/HLA-G/PSMB9/HLA-F                                                              |
| BP | GO:0007155~cell adhesion                                                                                   | 19 | 0.096 | 7.17E-08 | COL15A1/ITGB2/CXCL12/VCAM1/ISLR/LAMA4/CD44/COL7A1/CTGF/COL6A5/COL6A3/TGFB1/COL6A1/CD4/VCAN/LAMB1/THBS2/FN1/CDH11 |
| BP | GO:0035987~endodermal cell differentiation                                                                 | 7  | 0.035 | 8.77E-08 | COL4A2/COL7A1/COL6A1/ITGB2/LAMB1/MMP2/FN1                                                                        |
| BP | GO:0002474~antigen processing and presentation of peptide antigen via MHC class I                          | 7  | 0.035 | 1.72E-07 | HLA-DQB1/HLA-A/HLA-C/HLA-B/HLA-E/HLA-G/HLA-F                                                                     |
| BP | GO:0007189~adenylate cyclase-activating G-protein coupled receptor signaling pathway                       | 8  | 0.040 | 2.06E-07 | PTHLH/PTGER2/PTGER4/GNAQ/GHRH/ADCY8/DRD5/GHRHR                                                                   |
| BP | GO:0006954~inflammatory response                                                                           | 15 | 0.075 | 4.46E-06 | C3AR1/PTGER2/C3/AIF1/TACR1/LY86/ANXA1/ITGB2/CCL16/CXCL12/CYBB/CXCR6/PYCARD/CD14/CSF1R                            |
| BP | GO:0002504~antigen processing and presentation of peptide or polysaccharide antigen via MHC class II       | 5  | 0.025 | 1.10E-05 | HLA-DQB1/HLA-DPA1/HLA-DPB1/HLA-DMB/HLA-DMA                                                                       |
| BP | GO:0042102~positive regulation of T cell proliferation                                                     | 7  | 0.035 | 1.18E-05 | VCAM1/AIF1/ANXA1/CD4/HLA-DPA1/HLA-DPB1/HLA-DMB                                                                   |
| BP | GO:0007229~integrin-mediated signaling pathway                                                             | 8  | 0.040 | 2.17E-05 | DAB2/FBLN1/CTGF/COL3A1/ITGA1/FCER1G/ITGB2/TYROBP                                                                 |
| BP | GO:0002576~platelet degranulation                                                                          | 8  | 0.040 | 2.81E-05 | ISLR/SERPINF2/CLU/SERPING1/TMSB4X/SPARC/SRGN/FN1                                                                 |

|    |                                  |    |       |          |                                                                                                                                                                                                                                                                                                                                                                                                         |
|----|----------------------------------|----|-------|----------|---------------------------------------------------------------------------------------------------------------------------------------------------------------------------------------------------------------------------------------------------------------------------------------------------------------------------------------------------------------------------------------------------------|
| CC | GO:0031012~extracellular matrix  | 31 | 0.156 | 8.86E-25 | FMOD/LUM/COL3A1/CLU/DCN/MMP2/PCOLCE/CD93/COL7A1/COL6A5/COL6A3/TGFB1/COL6A1/LAMB1/LOXL1/THBS2/FN1/COL4A2/COL4A1/LGALS1/COL15A1/COL5A2/MMP13/ANXA2/LAMA4/FBLN1/COL14A1/FBLN2/FBLN5/COL1A2/VCAN                                                                                                                                                                                                            |
| CC | GO:0005576~extracellular region  | 54 | 0.272 | 2.49E-20 | S100A7/MMP2/CXCL12/CTGF/TGFB1/LOX/LOXL1/PMCH/CST3/HLA-C/SERP1NG1/MMP13/CD163/PTHLH/C1QA/C1QB/CHRD1/GHRH/SERPINF2/COL1A2/TMSB4X/VCAN/FMOD/C3/LUM/COL3A1/CLU/DCN/ISLR/COL7A1/COL6A5/COL6A3/PYCARD/COL6A1/LAMB1/THBS2/SRGN/FN1/BMP4/COL4A2/COL4A1/RNASE6/ANXA1/COL15A1/SPARC/CCL16/COL5A2/LAMA4/FBLN1/COL14A1/APOL1/FBLN2/FBLN5/CD14                                                                       |
| CC | GO:0070062~extracellular exosome | 65 | 0.327 | 1.09E-16 | S100A7/CD53/HLA-DMA/CXCL12/ACTR2/DAB2/CD44/TGFB1/CAP1/DPP7/GOLM1/FTL/BST2/SPARCL1/HLA-A/CST3/HLA-C/SERP1NG1/HLA-B/HLA-E/C1QA/STOM/C1QB/GNAQ/GNB1/SERPINF2/VAMP8/COL1A2/PDGFRB/SH3GL2/FRK/GNAI3/C3/IFITM3/LUM/CLU/ITGB2/ARPC5/SERP1NH1/PCOLCE/ISLR/VCAM1/ARPC2/COL6A3/COL6A1/LAMB1/FN1/COL4A2/LGALS1/RNASE6/ITGA1/ANXA1/COL15A1/FZD4/PSMB9/ANXA2/LAMA4/FBLN1/COL14A1/FBLN2/FBLN5/FCGR2A/FABP5/CD14/CDH11 |
| CC | GO:0005615~extracellular space   | 45 | 0.226 | 1.49E-16 | FMOD/C3/LUM/LY86/CLU/COL3A1/DCN/MMP2/CXCL12/SERP1NH1/PCOLCE/VCAM1/COL7A1/CTGF/TGFB1/COL6A3/LOX/LAMB1/LOXL1/GOLM1/SRGN/FN1/BMP4/SPARCL1/LGALS1/ANXA1/CST3/COL15A1/SERP1NG1/SPARC/CCL16/MMP13/ANXA2/PTHLH/STOM/AFP/FBLN1/COL14A1/APOL1/GHRH/SERP1NF2/FBLN5/COL1A2/VCAN/CD14                                                                                                                               |
| CC | GO:0009986~cell surface          | 29 | 0.146 | 2.30E-15 | CLU/ITGB2/LPAR1/CD53/HLA-DMA/GHRHR/VCAM1/CD44/CD93/FCER1G/HLA-DPB1/CSF1R/TYROBP/BST2/LGALS1/ANXA1/HLA-A/TSPAN14/ITGA1/HLA-C/SPARC/HLA-B/HLA-E/FZD4/ANXA2/HLA-F/SERPINF2/PDGFRB/HLA-DPA1                                                                                                                                                                                                                 |
| CC | GO:0005578~proteinaceous         | 22 | 0.111 | 3.07E-15 | BMP4/FMOD/SPARCL1/LUM/LGALS1/COL15A1/SPARC/MMP2/MMP13/COL                                                                                                                                                                                                                                                                                                                                               |

|    |                                                                                 |    |       |          |                                                                                                                                                                                                                                                                                                                                                                                                                                     |
|----|---------------------------------------------------------------------------------|----|-------|----------|-------------------------------------------------------------------------------------------------------------------------------------------------------------------------------------------------------------------------------------------------------------------------------------------------------------------------------------------------------------------------------------------------------------------------------------|
|    | extracellular matrix                                                            |    |       |          | 5A2/FBLN1/COL14A1/CTGF/COL6A5/FBLN2/FBLN5/COL6A3/TGFB1/COL1A2/VCAN/LOX/FN1                                                                                                                                                                                                                                                                                                                                                          |
| CC | GO:0005581~collagen trimer                                                      | 15 | 0.075 | 1.59E-14 | COL3A1/COL15A1/MMP13/COL5A2/SERPINH1/PCOLCE/C1QA/C1QB/COL14A1/COL7A1/COL6A5/COL6A3/COL1A2/COL6A1/LOX                                                                                                                                                                                                                                                                                                                                |
| CC | GO:0005886~plasma membrane                                                      | 70 | 0.352 | 2.89E-11 | QRFPR/ADCY8/LY86/TACR1/CD53/LPAR1/MMP2/GHRHR/DAB2/CD44/CD93/GPR45/CTGF/CXCR6/TGFB1/S1PR5/MC5R/CAP1/PTGER2/PTGER4/BST2/HLA-A/HLA-C/HLA-B/HLA-E/HLA-G/CD163/HLA-F/GRM3/GNAQ/GNB1/LPAR6/VAMP8/PDGFRB/HLA-DPA1/SH3GL2/HLA-DQB1/C3AR1/GNAI3/SNAP91/DRD3/C3/IFITM2/IFITM3/DRD5/FFAR1/OXTR/ITGB2/GNG11/GPR143/VCAM1/FCER1G/CD4/HLA-DPB1/TYROBP/CSF1R/SYT11/ITGA1/ANXA1/TSPAN14/SPARC/FZD4/ANXA2/GNGT1/CYBB/FCGR2B/FCGR2A/CD14/ADRA1D/CDH11 |
| CC | GO:0071556~integral component of lumenal side of endoplasmic reticulum membrane | 9  | 0.045 | 4.93E-11 | HLA-DQB1/HLA-A/HLA-C/HLA-DPA1/HLA-B/HLA-DPB1/HLA-E/HLA-G/HLA-F                                                                                                                                                                                                                                                                                                                                                                      |
| CC | GO:0042612~MHC class I protein complex                                          | 7  | 0.035 | 1.02E-10 | HLA-DQB1/HLA-A/HLA-C/HLA-B/HLA-E/HLA-G/HLA-F                                                                                                                                                                                                                                                                                                                                                                                        |
| CC | GO:0005604~basement membrane                                                    | 11 | 0.055 | 6.71E-10 | LAMA4/FBLN1/COL4A1/COL7A1/TGFB1/CST3/SPARC/LAMB1/THBS2/LOXL1/ANXA2                                                                                                                                                                                                                                                                                                                                                                  |
| CC | GO:0005788~endoplasmic reticulum lumen                                          | 14 | 0.070 | 4.50E-09 | COL4A2/COL4A1/COL3A1/COL15A1/COL5A2/SERPINH1/COLGALT2/COL14A1/COL7A1/COL6A3/COL1A2/COL6A1/CD4/RCN1                                                                                                                                                                                                                                                                                                                                  |
| CC | GO:0012507~ER to Golgi transport vesicle membrane                               | 9  | 0.045 | 7.41E-09 | HLA-DQB1/HLA-A/HLA-C/HLA-DPA1/HLA-B/HLA-DPB1/HLA-E/HLA-G/HLA-F                                                                                                                                                                                                                                                                                                                                                                      |
| CC | GO:0005887~integral component of plasma membrane                                | 34 | 0.171 | 1.50E-08 | QRFPR/C3AR1/DRD3/TACR1/DRD5/FFAR1/OXTR/CD53/LPAR1/LAPTM5/CD44/CXCR6/FCER1G/MC5R/GOLM1/TYROBP/CSF1R/PTPRB/PTGER2/BST2/PTGER4/SYT11/HLA-A/TSPAN14/HLA-C/HLA-B/FZD4/CD163/STOM/GRM3/CYBB/LPAR6/HLA-DPA1/ADRA1D                                                                                                                                                                                                                         |

|              |                                                        |    |       |          |                                                                                                                        |
|--------------|--------------------------------------------------------|----|-------|----------|------------------------------------------------------------------------------------------------------------------------|
| CC           | GO:0042613~MHC class II protein complex                | 7  | 0.035 | 1.54E-08 | HLA-DQB1/HLA-A/HLA-C/HLA-DPA1/HLA-DPB1/HLA-DMB/HLA-DMA                                                                 |
| CC           | GO:0005765~lysosomal membrane                          | 15 | 0.075 | 4.07E-08 | HLA-DQB1/GNAI3/IFITM3/HLA-DMB/GPR143/HLA-DMA/ANXA2/DAB2/LAP TM5/GNAQ/GNB1/VAMP8/COL6A1/HLA-DPA1/HLA-DPB1               |
| CC           | GO:0031093~platelet alpha granule lumen                | 8  | 0.040 | 2.57E-07 | ISLR/SERPINF2/CLU/SERPING1/TMSB4X/SPARC/SRGN/FN1                                                                       |
| CC           | GO:0030670~phagocytic vesicle membrane                 | 7  | 0.035 | 7.28E-06 | CYBB/HLA-A/HLA-C/HLA-B/HLA-E/HLA-G/HLA-F                                                                               |
| MF           | GO:0005201~extracellular matrix structural constituent | 14 | 0.070 | 8.59E-15 | COL4A2/COL4A1/LUM/COL3A1/COL15A1/COL5A2/FBLN1/LAMA4/COL14A1 /FBLN2/COL1A2/VCAN/CD4/LAMB1                               |
| MF           | GO:0005518~collagen binding                            | 13 | 0.065 | 6.54E-14 | COL14A1/CD44/SPARCL1/LUM/TGFBI/ITGA1/DCN/SPARC/MMP13/SERPINH 1/PCOLCE/SRGN/FN1                                         |
| MF           | GO:0042605~peptide antigen binding                     | 8  | 0.040 | 2.38E-09 | HLA-DQB1/HLA-A/HLA-C/HLA-DPA1/HLA-B/HLA-DPB1/HLA-E/HLA-F                                                               |
| MF           | GO:0048407~platelet-derived growth factor binding      | 5  | 0.025 | 1.43E-06 | COL4A1/COL3A1/COL1A2/PDGFRB/COL6A1                                                                                     |
| MF           | GO:0032395~MHC class II receptor activity              | 5  | 0.025 | 5.76E-06 | HLA-DQB1/HLA-C/HLA-DPA1/HLA-DPB1/HLA-DMA                                                                               |
|              |                                                        |    |       |          |                                                                                                                        |
| KEGG_PATHWAY | hsa05332:Graft-versus-host disease                     | 11 | 0.055 | 8.93E-12 | HLA-DQB1/HLA-A/HLA-C/HLA-DPA1/HLA-B/HLA-DPB1/HLA-DMB/HLA-E/HL A-DMA/HLA-G/HLA-F                                        |
| KEGG_PATHWAY | hsa04145:Phagosome                                     | 18 | 0.091 | 9.56E-12 | HLA-DQB1/NCF2/C3/HLA-A/ITGB2/HLA-C/HLA-B/HLA-DMB/HLA-E/HLA-DM A/HLA-G/HLA-F/FCGR2B/HLA-DPA1/FCGR2A/HLA-DPB1/THBS2/CD14 |
| KEGG_PATHWAY | hsa05330:Allograft rejection                           | 11 | 0.055 | 3.21E-11 | HLA-DQB1/HLA-A/HLA-C/HLA-DPA1/HLA-B/HLA-DPB1/HLA-DMB/HLA-E/HL A-DMA/HLA-G/HLA-F                                        |
| KEGG_PATHWAY | hsa05150:Staphylococcus aureus                         | 12 | 0.060 | 8.96E-11 | HLA-DQB1/C1QA/C3AR1/C1QB/FCGR2B/C3/HLA-DPA1/ITGB2/FCGR2A/HLA-                                                          |

|              |                                              |    |       |          |                                                                                                                               |
|--------------|----------------------------------------------|----|-------|----------|-------------------------------------------------------------------------------------------------------------------------------|
|              | infection                                    |    |       |          | DPB1/HLA-DMB/HLA-DMA                                                                                                          |
| KEGG_PATHWAY | hsa04512:ECM-receptor interaction            | 14 | 0.070 | 9.66E-11 | COL4A2/COL4A1/COL3A1/ITGA1/COL5A2/LAMA4/CD44/COL6A5/COL6A3/COL1A2/COL6A1/LAMB1/THBS2/FN1                                      |
| KEGG_PATHWAY | hsa04940:Type I diabetes mellitus            | 11 | 0.055 | 1.28E-10 | HLA-DQB1/HLA-A/HLA-C/HLA-DPA1/HLA-B/HLA-DPB1/HLA-DMB/HLA-E/HLA-DMA/HLA-G/HLA-F                                                |
| KEGG_PATHWAY | hsa05416:Viral myocarditis                   | 12 | 0.060 | 1.67E-10 | HLA-DQB1/HLA-A/HLA-C/HLA-DPA1/ITGB2/HLA-B/HLA-DPB1/HLA-DMB/HLA-E/HLA-DMA/HLA-G/HLA-F                                          |
| KEGG_PATHWAY | hsa05320:Autoimmune thyroid disease          | 11 | 0.055 | 1.24E-09 | HLA-DQB1/HLA-A/HLA-C/HLA-DPA1/HLA-B/HLA-DPB1/HLA-DMB/HLA-E/HLA-DMA/HLA-G/HLA-F                                                |
| KEGG_PATHWAY | hsa04612:Antigen processing and presentation | 12 | 0.060 | 4.20E-09 | HLA-DQB1/HLA-A/HLA-C/CD4/HLA-DPA1/HLA-B/HLA-DPB1/HLA-DMB/HLA-E/HLA-DMA/HLA-G/HLA-F                                            |
| KEGG_PATHWAY | hsa04514:Cell adhesion molecules (CAMs)      | 15 | 0.075 | 4.93E-09 | HLA-DQB1/HLA-A/ITGB2/HLA-C/HLA-B/HLA-DMB/HLA-E/HLA-DMA/HLA-G/HLA-F/VCAM1/CD4/VCAN/HLA-DPA1/HLA-DPB1                           |
| KEGG_PATHWAY | hsa04151:PI3K-Akt signaling pathway          | 20 | 0.101 | 1.18E-07 | COL4A2/COL4A1/COL3A1/ITGA1/GNG11/LPAR1/COL5A2/GNGT1/LAMA4/COL6A5/GNB1/LPAR6/COL6A3/COL1A2/PDGFRB/COL6A1/LAMB1/THBS2/FN1/CSF1R |
| KEGG_PATHWAY | hsa05200:Pathways in cancer                  | 21 | 0.106 | 1.89E-07 | BMP4/COL4A2/PTGER2/COL4A1/GNAI3/PTGER4/ADCY8/GNG11/LPAR1/MP2/FZD4/CXCL12/GNGT1/LAMA4/GNAQ/GNB1/LPAR6/PDGFRB/LAMB1/FN1/CSF1R   |
| KEGG_PATHWAY | hsa05166:HTLV-I infection                    | 17 | 0.086 | 2.22E-07 | EGR1/HLA-DQB1/ADCY8/HLA-A/HLA-C/ITGB2/HLA-B/HLA-DMB/HLA-E/HLA-DMA/FZD4/HLA-G/HLA-F/VCAM1/PDGFRB/HLA-DPA1/HLA-DPB1             |
| KEGG_PATHWAY | hsa04974:Protein digestion and absorption    | 11 | 0.055 | 2.37E-07 | COL4A2/COL14A1/COL4A1/COL7A1/COL6A5/COL3A1/COL6A3/COL1A2/COL15A1/COL6A1/COL5A2                                                |
| KEGG_PATHWAY | hsa05146:Amoebiasis                          | 11 | 0.055 | 1.37E-06 | COL4A2/LAMA4/COL4A1/GNAQ/COL3A1/COL1A2/ITGB2/LAMB1/COL5A2/CD14/FN1                                                            |
| KEGG_PATHWAY | hsa04510:Focal adhesion                      | 14 | 0.070 | 3.35E-06 | COL4A2/COL4A1/COL3A1/ITGA1/COL5A2/LAMA4/COL6A5/COL6A3/COL1A2                                                                  |

|              |                                                       |    |       |          |                                                                                   |
|--------------|-------------------------------------------------------|----|-------|----------|-----------------------------------------------------------------------------------|
|              |                                                       |    |       |          | /COL6A1/PDGFRB/LAMB1/THBS2/FN1                                                    |
| KEGG_PATHWAY | hsa05140:Leishmaniasis                                | 9  | 0.045 | 4.36E-06 | HLA-DQB1/NCF2/C3/HLA-DPA1/ITGB2/FCGR2A/HLA-DPB1/HLA-DMB/HLA-DMA                   |
| KEGG_PATHWAY | hsa05133:Pertussis                                    | 9  | 0.045 | 6.62E-06 | C1QA/C1QB/GNAI3/C3/PYCARD/IRF1/SERPING1/ITGB2/CD14                                |
| KEGG_PATHWAY | hsa05168:Herpes simplex infection                     | 12 | 0.060 | 3.19E-05 | HLA-DQB1/C3/HLA-A/HLA-C/HLA-DPA1/HLA-B/HLA-DPB1/HLA-DMB/HLA-E/HLA-DMA/HLA-G/HLA-F |
| KEGG_PATHWAY | hsa05169:Epstein-Barr virus infection                 | 10 | 0.050 | 3.55E-05 | HLA-DQB1/CD44/HLA-A/HLA-C/HLA-DPA1/HLA-B/HLA-DPB1/HLA-E/HLA-G/HLA-F               |
| KEGG_PATHWAY | hsa05310:Asthma                                       | 6  | 0.030 | 4.42E-05 | HLA-DQB1/FCER1G/HLA-DPA1/HLA-DPB1/HLA-DMB/HLA-DMA                                 |
| KEGG_PATHWAY | hsa04611:Platelet activation                          | 10 | 0.050 | 5.87E-05 | GNAI3/GNAQ/VAMP8/ADCY8/COL3A1/COL1A2/FCER1G/FCGR2A/COL5A2/LCP2                    |
| KEGG_PATHWAY | hsa04080:Neuroactive ligand-receptor interaction      | 14 | 0.070 | 7.95E-05 | C3AR1/PTGER2/DRD3/PTGER4/DRD5/TACR1/OXTR/LPAR1/GHRHR/GRM3/LPAR6/S1PR5/MC5R/ADRA1D |
| KEGG_PATHWAY | hsa05152:Tuberculosis                                 | 11 | 0.055 | 1.26E-04 | HLA-DQB1/FCGR2B/C3/FCER1G/HLA-DPA1/ITGB2/FCGR2A/HLA-DPB1/HLA-DMB/HLA-DMA/CD14     |
| KEGG_PATHWAY | hsa04672:Intestinal immune network for IgA production | 6  | 0.030 | 3.97E-04 | HLA-DQB1/HLA-DPA1/HLA-DPB1/HLA-DMB/HLA-DMA/CXCL12                                 |
| KEGG_PATHWAY | hsa05322:Systemic lupus erythematosus                 | 9  | 0.045 | 4.26E-04 | HLA-DQB1/C1QA/C1QB/C3/HLA-DPA1/FCGR2A/HLA-DPB1/HLA-DMB/HLA-DMA                    |
| KEGG_PATHWAY | hsa05145:Toxoplasmosis                                | 8  | 0.040 | 6.75E-04 | HLA-DQB1/LAMA4/GNAI3/HLA-DPA1/HLA-DPB1/HLA-DMB/LAMB1/HLA-DMA                      |
| KEGG_PATHWAY | hsa05323:Rheumatoid arthritis                         | 7  | 0.035 | 1.15E-03 | HLA-DQB1/HLA-DPA1/ITGB2/HLA-DPB1/HLA-DMB/HLA-DMA/CXCL12                           |
| KEGG_PATHWAY | hsa04610:Complement and coagulation cascades          | 6  | 0.030 | 2.30E-03 | C1QA/C3AR1/C1QB/C3/SERPINF2/SERPING1                                              |
| KEGG_PATHWAY | hsa04724:Glutamatergic synapse                        | 7  | 0.035 | 4.29E-03 | GNGT1/GRM3/GNAI3/GNAQ/GNB1/ADCY8/GNG11                                            |
| KEGG_PATHWAY | hsa04144:Endocytosis                                  | 10 | 0.050 | 5.07E-03 | DAB2/ARPC2/HLA-A/HLA-C/HLA-B/ARPC5/HLA-E/SH3GL2/HLA-G/HLA-F                       |

|              |                                               |   |       |          |                                                 |
|--------------|-----------------------------------------------|---|-------|----------|-------------------------------------------------|
| KEGG_PATHWAY | hsa04728:Dopaminergic synapse                 | 7 | 0.035 | 7.52E-03 | GNGT1/GNAI3/DRD3/GNAQ/GNB1/DRD5/GNG11           |
| KEGG_PATHWAY | hsa04380:Osteoclast differentiation           | 7 | 0.035 | 8.39E-03 | CYBB/FCGR2B/NCF2/FCGR2A/CSF1R/LCP2/TYROBP       |
| KEGG_PATHWAY | hsa04713:Circadian entrainment                | 6 | 0.030 | 9.03E-03 | GNGT1/GNAI3/GNAQ/GNB1/ADCY8/GNG11               |
| KEGG_PATHWAY | hsa05321:Inflammatory bowel disease (IBD)     | 5 | 0.025 | 1.07E-02 | HLA-DQB1/HLA-DPA1/HLA-DPB1/HLA-DMB/HLA-DMA      |
| KEGG_PATHWAY | hsa04723:Retrograde endocannabinoid signaling | 6 | 0.030 | 1.16E-02 | GNGT1/GNAI3/GNAQ/GNB1/ADCY8/GNG11               |
| KEGG_PATHWAY | hsa04062:Chemokine signaling pathway          | 8 | 0.040 | 1.26E-02 | GNGT1/GNAI3/GNB1/ADCY8/CXCR6/GNG11/CCL16/CXCL12 |
| KEGG_PATHWAY | hsa04725:Cholinergic synapse                  | 6 | 0.030 | 1.69E-02 | GNGT1/GNAI3/GNAQ/GNB1/ADCY8/GNG11               |
| KEGG_PATHWAY | hsa04670:Leukocyte transendothelial migration | 6 | 0.030 | 1.94E-02 | VCAM1/GNAI3/NCF2/ITGB2/CXCL12/MMP2              |
| KEGG_PATHWAY | hsa04015:Rap1 signaling pathway               | 8 | 0.040 | 2.31E-02 | GNAI3/GNAQ/ADCY8/PDGFRB/ITGB2/LPAR1/CSF1R/LCP2  |
| KEGG_PATHWAY | hsa05222:Small cell lung cancer               | 5 | 0.025 | 2.76E-02 | COL4A2/LAMA4/COL4A1/LAMB1/FN1                   |
| KEGG_PATHWAY | hsa04727:GABAergic synapse                    | 5 | 0.025 | 2.76E-02 | GNGT1/GNAI3/GNB1/ADCY8/GNG11                    |
| KEGG_PATHWAY | hsa04640:Hematopoietic cell lineage           | 5 | 0.025 | 2.97E-02 | CD44/ITGA1/CD4/CD14/CSF1R                       |
| KEGG_PATHWAY | hsa04540:Gap junction                         | 5 | 0.025 | 3.09E-02 | GNAI3/GNAQ/ADCY8/PDGFRB/LPAR1                   |
| KEGG_PATHWAY | hsa04020:Calcium signaling pathway            | 7 | 0.035 | 3.38E-02 | GNAQ/ADCY8/TACR1/DRD5/PDGFRB/OXTR/ADRA1D        |
| KEGG_PATHWAY | hsa05032:Morphine addiction                   | 5 | 0.025 | 3.43E-02 | GNGT1/GNAI3/GNB1/ADCY8/GNG11                    |
| KEGG_PATHWAY | hsa05134:Legionellosis                        | 4 | 0.020 | 3.61E-02 | C3/PYCARD/ITGB2/CD14                            |
