# Supplementary material for: Identification of the Potential Molecular Mechanism of TGFBI Gene in Persistent Atrial Fibrillation
Source: Comput Math Methods Med. 2022 Nov 8;2022:1643674. doi: 10.1155/2022/1643674 (PMC9666036; doi:10.1155/2022/1643674)
Supplement: Supplementary Materials — Table S1: GO annotation of TGFBI and coexpression genes enriched in AF. Table S2: GO annotation and KEGG pathway TGFBI and coexpression genes enriched in cluster 1. Figure S1: the clusters constructed from the PPI-network. [file 1643674.f1.zip]

Archive with 3 entries (3 files):
- Figure S1.pdf
- Table S1. GO annotation of TGFBI and co-expression genes enriched in AF.pdf
- Table S2. GO annotation and KEGG pathway TGFBI and co-expression genes enriched in Cluster 1.pdf
