# Supplementary figures and images for: Identification of the Potential Molecular Mechanism of TGFBI Gene in Persistent Atrial Fibrillation
Source: Hindawi journal article supplement (doi:10.1155/2022/1643674), 2022-11-08

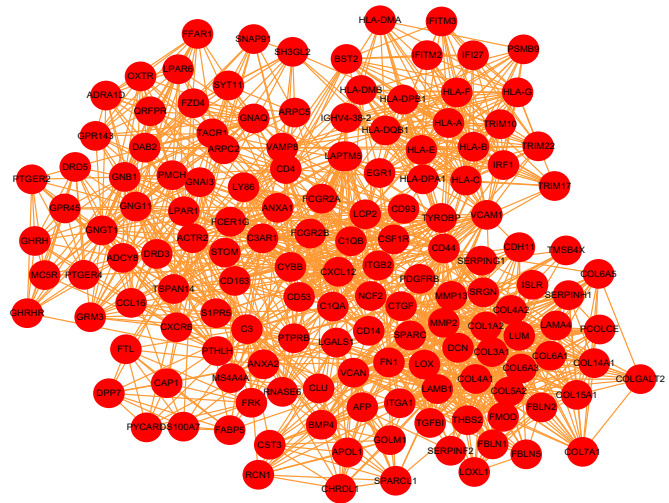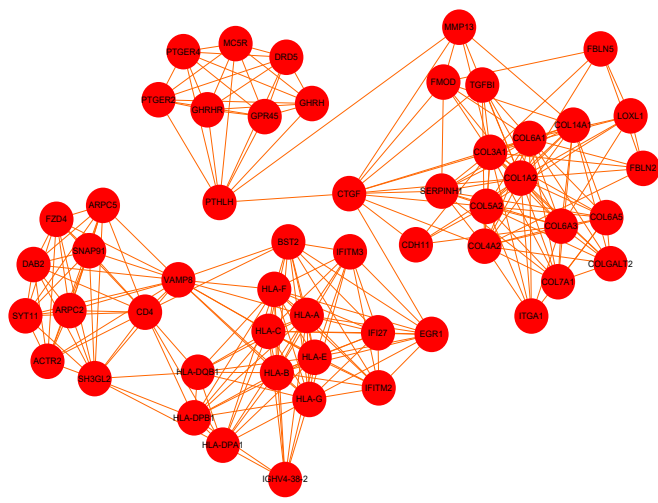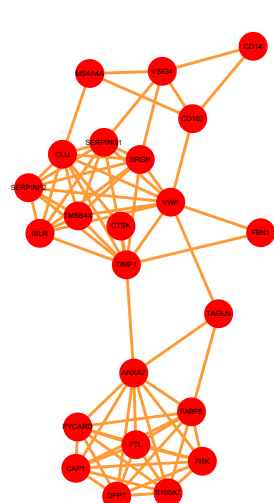

Supplement: f1 [file 1643674.f1.zip]
